# Supplementary material
Source: Research Square preprint supplement (doi:10.21203/rs.3.rs-9030078/v1)
Supplement: Supplementary file 1 [file 530e00ce06e7a2ab88f4daf3.docx]

|  | **HAICI** | **DECCB** | **ERRQD** | **CSTEF** | **COGDR** | **INQCL** | **KNWLS** | **ETHAU** | **STRQL** | **HCTRP** |
| --- | --- | --- | --- | --- | --- | --- | --- | --- | --- | --- |
| AIEPJ | VHI | LI | HI | VHI | EI | SLI | LI | SLI | VHI | HI |
| AISIM | EI | VLI | HI | SMI | VLI | VLI | SLI | LI | SMI | SMI |
| VIBPM | SLI | LI | EI | EI | VLI | VLI | LI | VLI | SMI | SMI |
| PRTMM | SMI | LI | SMI | SMI | LI | ALI | LI | LI | EI | SMI |
| AIHCL | HI | LI | AMI | VHI | SLI | LI | LI | SMI | AMI | HI |
| UCAPI | VHI | VLI | AMI | AMI | ALI | ALI | VLI | ALI | VHI | VHI |
| FARSM | VHI | EI | VHI | HI | EI | SLI | SLI | SLI | HI | HI |
|  | **HAICI** | **DECCB** | **ERRQD** | **CSTEF** | **COGDR** | **INQCL** | **KNWLS** | **ETHAU** | **STRQL** | **HCTRP** |
| AIEPJ | VHI | LI | VHI | HI | LI | LI | LI | LI | VHI | HI |
| AISIM | HI | LI | SMI | EI | VLI | LI | VLI | VLI | SMI | EI |
| VIBPM | HI | VLI | SLI | SMI | LI | VLI | VLI | LI | HI | EI |
| PRTMM | EI | LI | SMI | SMI | VLI | LI | LI | LI | EI | EI |
| AIHCL | AMI | EI | VHI | VHI | EI | EI | SMI | EI | VHI | AMI |
| UCAPI | VHI | VLI | VHI | VHI | ALI | VLI | ALI | VLI | VHI | VHI |
| FARSM | HI | EI | HI | HI | EI | SLI | EI | SLI | VHI | HI |
|  | **HAICI** | **DECCB** | **ERRQD** | **CSTEF** | **COGDR** | **INQCL** | **KNWLS** | **ETHAU** | **STRQL** | **HCTRP** |
| AIEPJ | HI | SLI | VHI | VHI | LI | SLI | LI | EI | HI | VHI |
| AISIM | SMI | VLI | SMI | EI | VLI | SLI | SLI | LI | HI | SMI |
| VIBPM | HI | LI | SMI | EI | LI | LI | VLI | VLI | SLI | SLI |
| PRTMM | SMI | ALI | EI | EI | ALI | ALI | ALI | LI | SMI | SMI |
| AIHCL | AMI | SMI | AMI | AMI | LI | EI | EI | LI | AMI | AMI |
| UCAPI | AMI | VLI | AMI | AMI | ALI | VLI | ALI | VLI | AMI | AMI |
| FARSM | VHI | EI | HI | HI | SLI | EI | SLI | EI | VHI | VHI |
|  | **HAICI** | **DECCB** | **ERRQD** | **CSTEF** | **COGDR** | **INQCL** | **KNWLS** | **ETHAU** | **STRQL** | **HCTRP** |
| AIEPJ | HI | SLI | HI | VHI | SLI | EI | SLI | EI | HI | VHI |
| AISIM | HI | SLI | EI | SMI | LI | VLI | LI | SLI | SMI | SMI |
| VIBPM | EI | VLI | SMI | EI | VLI | VLI | LI | VLI | EI | SLI |
| PRTMM | SMI | LI | EI | EI | ALI | ALI | VLI | ALI | SMI | EI |
| AIHCL | HI | LI | VHI | VHI | EI | LI | LI | SLI | HI | HI |
| UCAPI | AMI | VLI | AMI | AMI | ALI | VLI | ALI | VLI | VHI | AMI |
| FARSM | HI | EI | HI | VHI | EI | SLI | SLI | SLI | HI | HI |
|  | **HAICI** | **DECCB** | **ERRQD** | **CSTEF** | **COGDR** | **INQCL** | **KNWLS** | **ETHAU** | **STRQL** | **HCTRP** |
| AIEPJ | HI | SLI | VHI | VHI | LI | SLI | EI | SLI | HI | HI |
| AISIM | SMI | LI | SMI | SMI | LI | VLI | VLI | SLI | EI | HI |
| VIBPM | SLI | LI | SLI | HI | VLI | VLI | LI | LI | SMI | SMI |
| PRTMM | SMI | VLI | SMI | EI | VLI | ALI | VLI | ALI | SMI | SMI |
| AIHCL | VHI | LI | VHI | VHI | LI | SMI | SLI | SMI | HI | AMI |
| UCAPI | AMI | ALI | VHI | VHI | VLI | ALI | VLI | VLI | VHI | AMI |
| FARSM | VHI | SLI | VHI | VHI | EI | EI | EI | EI | VHI | HI |
|  | **HAICI** | **DECCB** | **ERRQD** | **CSTEF** | **COGDR** | **INQCL** | **KNWLS** | **ETHAU** | **STRQL** | **HCTRP** |
| AIEPJ | VHI | LI | HI | VHI | EI | LI | EI | SLI | VHI | VHI |
| AISIM | HI | VLI | HI | EI | VLI | LI | LI | VLI | EI | EI |
| VIBPM | EI | VLI | SMI | EI | LI | VLI | VLI | LI | EI | SMI |
| PRTMM | SMI | VLI | EI | EI | ALI | VLI | VLI | ALI | SMI | SMI |
| AIHCL | AMI | SLI | AMI | HI | LI | LI | SMI | EI | VHI | VHI |
| UCAPI | AMI | VLI | VHI | AMI | ALI | VLI | ALI | VLI | AMI | VHI |
| FARSM | HI | EI | HI | HI | SLI | SLI | SLI | SLI | VHI | VHI |
|  | **HAICI** | **DECCB** | **ERRQD** | **CSTEF** | **COGDR** | **INQCL** | **KNWLS** | **ETHAU** | **STRQL** | **HCTRP** |
| AIEPJ | VHI | LI | HI | VHI | EI | LI | SLI | EI | HI | HI |
| AISIM | HI | SLI | EI | HI | LI | SLI | SLI | VLI | SMI | SMI |
| VIBPM | EI | VLI | SMI | SLI | LI | LI | VLI | VLI | EI | SMI |
| PRTMM | SMI | VLI | EI | EI | ALI | LI | LI | LI | EI | SMI |
| AIHCL | HI | LI | AMI | HI | EI | SMI | LI | SLI | HI | HI |
| UCAPI | AMI | VLI | VHI | VHI | VLI | ALI | ALI | ALI | AMI | AMI |
| FARSM | VHI | SLI | HI | VHI | SLI | EI | EI | SLI | HI | VHI |
|  | **HAICI** | **DECCB** | **ERRQD** | **CSTEF** | **COGDR** | **INQCL** | **KNWLS** | **ETHAU** | **STRQL** | **HCTRP** |
| AIEPJ | VHI | SLI | HI | VHI | LI | SLI | EI | EI | HI | VHI |
| AISIM | SMI | LI | SMI | HI | LI | VLI | VLI | SLI | SMI | EI |
| VIBPM | HI | VLI | SMI | SMI | VLI | VLI | LI | VLI | EI | EI |
| PRTMM | SMI | VLI | SMI | SMI | LI | LI | LI | VLI | EI | EI |
| AIHCL | VHI | SLI | HI | HI | EI | SMI | LI | SLI | HI | AMI |
| UCAPI | VHI | VLI | AMI | AMI | ALI | ALI | ALI | ALI | AMI | AMI |
| FARSM | VHI | SLI | HI | VHI | SLI | SLI | SLI | EI | HI | VHI |
|  | **HAICI** | **DECCB** | **ERRQD** | **CSTEF** | **COGDR** | **INQCL** | **KNWLS** | **ETHAU** | **STRQL** | **HCTRP** |
| AIEPJ | HI | EI | HI | VHI | LI | LI | SLI | EI | HI | HI |
| AISIM | SMI | SLI | SMI | HI | LI | VLI | LI | VLI | EI | HI |
| VIBPM | SLI | LI | SLI | SLI | LI | LI | LI | VLI | EI | EI |
| PRTMM | EI | ALI | EI | EI | ALI | LI | VLI | VLI | SMI | SMI |
| AIHCL | AMI | SMI | VHI | AMI | SLI | EI | SMI | LI | VHI | AMI |
| UCAPI | VHI | ALI | VHI | AMI | VLI | VLI | VLI | ALI | AMI | AMI |
| FARSM | HI | EI | HI | VHI | SLI | EI | SLI | EI | VHI | VHI |
|  | **HAICI** | **DECCB** | **ERRQD** | **CSTEF** | **COGDR** | **INQCL** | **KNWLS** | **ETHAU** | **STRQL** | **HCTRP** |
| AIEPJ | VHI | SLI | HI | VHI | LI | EI | LI | LI | VHI | HI |
| AISIM | HI | VLI | HI | SMI | SLI | LI | LI | LI | EI | SMI |
| VIBPM | HI | LI | SLI | HI | VLI | LI | VLI | LI | EI | SLI |
| PRTMM | SMI | VLI | SMI | EI | VLI | ALI | ALI | ALI | EI | EI |
| AIHCL | VHI | EI | VHI | AMI | EI | EI | SMI | SLI | HI | AMI |
| UCAPI | VHI | VLI | VHI | VHI | ALI | ALI | ALI | VLI | AMI | VHI |
| FARSM | HI | SLI | VHI | HI | SLI | SLI | SLI | EI | HI | VHI |
